# Supplementary material for: A randomized controlled trial of Promoting Physical Activity in Regional and Remote Cancer Survivors (PPARCS)
Source: PubMed Central journal article supplement — J Sport Health Sci. 2023 Feb 3;13(1):81–9. doi: 10.1016/j.jshs.2023.01.003 (PMC10818110; doi:10.1016/j.jshs.2023.01.003), 2023-02-03
Supplement: mmc1.pdf [file mmc1.pdf]

Original article

A randomized controlled trial of Promoting Physical Activity in Regional and Remote Cancer Survivors (PPARCS)

Sarah J Hardcastle <sup>a,b,c,\*</sup>, Chloe Maxwell-Smith <sup>c</sup>, Vinicius Cavalheri <sup>d,e</sup>, Terry Boyle <sup>f</sup>, Marta Leyton Román <sup>g</sup>, Cameron Platell <sup>h</sup>, Michael Levitt <sup>h</sup>, Christobel Saunders <sup>h,i</sup>, Frank Sardelic <sup>j</sup>, Sophie Nightingale <sup>j</sup>, Jacob McCormick <sup>k</sup>, Craig Lynch <sup>l</sup>, Paul A. Cohen <sup>b,h,m</sup>, Max Bulsara <sup>b</sup>, Dana Hince <sup>b</sup>

<sup>a</sup> Sport and Physical Activity Research Centre, Sheffield Hallam University, Sheffield, S10 2BP, UK

<sup>b</sup> Institute for Health Research, The University of Notre Dame, Fremantle, WA 6959, Australia

<sup>c</sup> Curtin School of Population Health, Curtin University, Perth, WA 6845, Australia

<sup>d</sup> Curtin School of Allied Health, Curtin University, Perth, WA 6845, Australia

<sup>e</sup> Allied Health, South Metropolitan Health Service, Murdoch, WA 6150, Australia

<sup>f</sup> Australian Centre for Precision Health, University of South Australia, Adelaide, SA 5001, Australia

<sup>g</sup> Department of Didactics of Musical, Plastic and Body Expression, University of Extremadura, Caceres 10071, Spain

<sup>h</sup> St. John of God Subiaco Hospital, Perth, WA 6008, Australia

<sup>l</sup> Department of Surgery, University of Melbourne, Melbourne, VIC 3010, Australia

<sup>j</sup>Tamara Private Hospital, Tamworth, NSW 2340, Australia

<sup>k</sup>Peter MacCallum Cancer Centre, Melbourne, VIC 3000, Australia

<sup>l</sup>College of Health and Medicine, Australian National University, Canberra, ACT 2600,  
Australia

<sup>m</sup>Division of Obstetrics and Gynaecology, Medical School, University of Western Australia,  
Perth, WA 6009, Australia

\* Corresponding author.

Email address: Sarah.Hardcastle@shu.ac.uk

---

Running title: PPARCS trial to promote PA in cancer survivors

**Supplementary Tables**

Supplementary Table 1. Estimated between arm (net mean difference) and within arm (T2–T1) mean differences (95%CI) for MVPA and secondary ActiGraph activity outcomes for completers (data available for both T1 and T2), protocol adherers (completed 4 or more health-coaching sessions), and insufficiently active participants (<150 min/week MVPA from ActiGraph at T1).

|                                         | Intervention change–Control<br>change (T2) |                 | Arm x Time<br>interaction |              | Intervention change (T2–T1) |                 | Control change (T2–T1) |                 |
|-----------------------------------------|--------------------------------------------|-----------------|---------------------------|--------------|-----------------------------|-----------------|------------------------|-----------------|
|                                         | Net mean<br>difference                     | 95%CI           | $\chi^2(1)^1$             | p            | Mean<br>difference          | 95%CI           | Mean<br>difference     | 95%CI           |
| <b>COMPLETERS (n = 72)</b>              |                                            |                 |                           |              |                             |                 |                        |                 |
| MVPA (min/week)                         | 45.1                                       | 8.3 to 81.9     | 5.77                      | <b>0.016</b> | 64.7                        | 37.0 to 92.5    | 19.6                   | –4.5 to 43.8    |
| MV10                                    | 38.0                                       | 10.0 to 66.0    | 7.08                      | <b>0.008</b> | 48.2                        | 25.5 to 71.0    | 10.2                   | –5.4 to 28.8    |
| Moderate PA (min/week)                  | 44.5                                       | 7.5 to 81.5     | 5.56                      | <b>0.018</b> | 60.7                        | 32.7 to 88.6    | 16.1                   | –8.1 to 40.4    |
| Light (min/week)                        | –2.2                                       | –177.7 to 173.3 | 0.00                      | 0.980        | 131.6                       | –0.8 to 264.1   | 133.9                  | 18.7 to 249.0   |
| Sedentary time (min/week)               | –49.0                                      | –256.5 to 158.4 | 0.21                      | 0.643        | –184.1                      | –340.7 to –27.5 | –135.1                 | –271.3 to 1.07  |
| Sedentary<br><br>≥20–min bouts (h/week) | –37.8                                      | –255.9 to 180.3 | 0.12                      | 0.734        | –54.7                       | –219.3 to 109.9 | –16.9                  | –160.0 to 126.2 |
| <b>PROTOCOL ADHERERS</b>                |                                            |                 |                           |              |                             |                 |                        |                 |

**(n = 80)**

|                                     |       |                 |      |              |        |                 |        |                 |
|-------------------------------------|-------|-----------------|------|--------------|--------|-----------------|--------|-----------------|
| MVPA (min/week)                     | 47.8  | 11.3 to 84.3    | 6.6  | <b>0.010</b> | 66.7   | 39.2 to 94.2    | 18.9   | -5.1 to 42.9    |
| MV10                                | 37.9  | 9.9 to 65.8     | 7.1  | <b>0.008</b> | 48.2   | 24.5 to 71.9    | 10.3   | -5.5 to 26.2    |
| Moderate PA (min/week)              | 47.4  | 10.6 to 84.1    | 6.4  | <b>0.012</b> | 62.7   | 35.1 to 90.3    | 15.3   | -8.8 to 39.5    |
| Light (min/week)                    | 11.8  | -162.9 to 186.4 | 0.02 | 0.895        | 139.8  | 8.3 to 271.4    | 128.1  | 13.2 to 242.9   |
| Sedentary time (min/week)           | -54.7 | -261.4 to 152.0 | 0.27 | 0.604        | -184.1 | -339.8 to -28.5 | -129.4 | -265.4 to 6.6   |
| Sedentary<br>≥20-min bouts (h/week) | -42.4 | -259.4 to 174.6 | 0.15 | 0.702        | -51.9  | -215 to 111.5   | -9.6   | -152.4 to 133.3 |

**INSUFFICIENTLY****ACTIVE (n = 54)**

|                           |       |                 |      |       |        |                |        |                |
|---------------------------|-------|-----------------|------|-------|--------|----------------|--------|----------------|
| MVPA (min/week)           | 30.4  | -4.2 to 65.0    | 2.96 | 0.085 | 61.0   | 34.3 to 87.6   | 30.6   | 8.5 to 52.7    |
| MV10                      | 31.9  | -3.5 to 67.3    | 3.12 | 0.078 | 47.5   | 18.4 to 76.7   | 15.6   | -4.4 to 35.6   |
| Moderate PA (min/week)    | 22.5  | -9.5 to 54.6    | 1.90 | 0.168 | 52.7   | 28.0 to 77.4   | 30.1   | 9.7 to 50.6    |
| Light (min/week)          | -84.9 | -287.0 to 117.2 | 0.68 | 0.411 | 98.4   | -59.3 to 256.1 | 183.3  | 56.9 to 309.7  |
| Sedentary time (min/week) | 44.6  | -210.6 to 299.8 | 0.12 | 0.732 | -124.8 | -323.4 to 73.9 | -169.4 | -329.5 to -9.2 |

|           |      |                 |      |       |     |                 |      |                 |
|-----------|------|-----------------|------|-------|-----|-----------------|------|-----------------|
| Sedentary | -9.2 | -319.6 to 301.2 | 0.00 | 0.954 | 6.3 | -234.9 to 247.5 | 15.5 | -179.8 to 210.9 |
|-----------|------|-----------------|------|-------|-----|-----------------|------|-----------------|

≥20-min bouts (h/week)

---

Mean differences are estimated from the mixed model.

<sup>1</sup>Wald  $\chi^2$  test for the Arm x Time interaction.

Abbreviations: 95%CI = 95% confidence interval; MV10 = minutes of moderate-to-vigorous physical activity completed in bouts of at least 10 min MVPA = moderate-to-vigorous physical activity; PA = physical activity. T1= Baseline ; T2 = 12-weeks following baseline.

Supplementary Table 2. Estimated between arm (net mean difference) and within arm (T2–T1) mean differences (95% CI) for ActiGraph-derived outcomes following adjustments for sex, cancer type, ActiGraph wear-time, age, comorbidity index, and remoteness classification (inner rural vs. other).

|                    | Covariate         | Intervention change–Control change (T2) |              | Arm x Time interaction <sup>1</sup> |              | Intervention change (T2–T1) |              | Control change (T2–T1)   |              |
|--------------------|-------------------|-----------------------------------------|--------------|-------------------------------------|--------------|-----------------------------|--------------|--------------------------|--------------|
|                    |                   | Adjusted net difference                 | 95%CI        | $\chi^2(1)$                         | <i>p</i>     | Adjusted mean difference    | 95%CI        | Adjusted mean difference | 95%CI        |
| <b>MVPA</b>        |                   |                                         |              |                                     |              |                             |              |                          |              |
| (min/week)         | Sex               | 49.8                                    | 13.5 to 86.0 | 7.25                                | <b>0.007</b> | 68.6                        | 41.4 to 95.8 | 18.8                     | –5.1 to 42.8 |
|                    | Cancer type       | 50.2                                    | 14.0 to 86.5 | 7.37                                | <b>0.007</b> | 68.9                        | 41.7 to 96.2 | 18.7                     | –5.3 to 42.9 |
|                    | Wear-time (min)   | 49.3                                    | 13.0 to 85.7 | 7.07                                | <b>0.008</b> | 67.7                        | 40.4 to 95.0 | 18.4                     | –5.7 to 42.4 |
|                    | Age               | 49.9                                    | 13.7 to 86.1 | 7.31                                | <b>0.007</b> | 69.6                        | 42.4 to 96.7 | 19.6                     | –4.3 to 43.6 |
|                    | Comorbidity index | 48.3                                    | 12.1 to 84.4 | 6.85                                | <b>0.009</b> | 67.5                        | 40.4 to 94.6 | 19.2                     | –4.7 to 43.1 |
|                    | Remoteness        | 45.7                                    | 9.6 to 81.9  | 6.17                                | <b>0.013</b> | 64.6                        | 37.4 to 91.9 | 18.9                     | –4.8 to 42.6 |
| <b>MV10</b>        |                   |                                         |              |                                     |              |                             |              |                          |              |
| (min/week)         | Sex               | 39.7                                    | 12.1 to 67.2 | 8.0                                 | <b>0.005</b> | 50.1                        | 27.9 to 72.3 | 10.4                     | –5.3 to 26.2 |
|                    | Cancer type       | 40.2                                    | 12.6 to 67.8 | 8.2                                 | <b>0.004</b> | 50.3                        | 28.1 to 72.4 | 10.1                     | –5.6 to 25.8 |
|                    | Wear-time (min)   | 38.0                                    | 10.8 to 65.3 | 7.5                                 | <b>0.006</b> | 48.1                        | 26.5 to 69.8 | 10.1                     | –5.9 to 26.1 |
|                    | Age               | 38.8                                    | 11.4 to 66.3 | 7.7                                 | <b>0.006</b> | 50.1                        | 28.1 to 72.1 | 11.3                     | –4.6 to 27.1 |
|                    | Comorbidity index | 38.7                                    | 11.2 to 66.2 | 7.6                                 | <b>0.006</b> | 49.2                        | 27.1 to 71.4 | 10.5                     | –5.2 to 26.2 |
|                    | Remoteness        | 43.4                                    | 17.0 to 69.8 | 10.4                                | <b>0.001</b> | 53.9                        | 32.0 to 75.8 | 10.5                     | –4.5 to 25.4 |
| <b>Moderate PA</b> |                   |                                         |              |                                     |              |                             |              |                          |              |
| (min/week)         | Sex               | 49.4                                    | 13.0 to 85.8 | 7.07                                | <b>0.008</b> | 64.7                        | 37.4 to 92.0 | 15.3                     | –8.8 to 39.4 |
|                    | Cancer type       | 49.8                                    | 13.4 to 86.3 | 7.18                                | <b>0.007</b> | 65.0                        | 37.7 to 92.3 | 15.2                     | –8.9 to 39.3 |
|                    | Wear-time (min)   | 49.0                                    | 12.4 to 85.6 | 6.89                                | <b>0.009</b> | 63.9                        | 36.4 to 91.4 | 14.9                     | –9.3 to 39.1 |
|                    | Age               | 49.5                                    | 13.1 to 85.9 | 7.12                                | <b>0.008</b> | 65.6                        | 38.4 to 92.8 | 16.1                     | –8.0 to 40.2 |
|                    | Comorbidity index | 47.9                                    | 11.6 to 84.2 | 6.68                                | <b>0.010</b> | 63.6                        | 36.4 to 90.8 | 15.7                     | –8.3 to 39.7 |
|                    | Remoteness        | 43.6                                    | 7.9 to 79.3  | 5.74                                | <b>0.017</b> | 59.0                        | 32.1 to 85.9 | 15.4                     | –8.0 to 38.8 |

|                         |                   |       |                 |      |       |        |                 |        |                 |
|-------------------------|-------------------|-------|-----------------|------|-------|--------|-----------------|--------|-----------------|
| Light PA                |                   |       |                 |      |       |        |                 |        |                 |
| (min/week)              | Sex               | 34.4  | -140.0 to 208.8 | 0.15 | 0.699 | 163.3  | 32.3 to 294.2   | 128.8  | 13.7 to 244.0   |
|                         | Cancer type       | 29.3  | -145.0 to 203.5 | 0.11 | 0.742 | 158.2  | 27.3 to 289.0   | 128.9  | 13.9 to 244.0   |
|                         | Wear-time (min)   | 23.5  | -140.1 to 187.1 | 0.08 | 0.778 | 143.9  | 21.0 to 266.9   | 120.4  | 12.4 to 228.5   |
|                         | Age               | 31.0  | -143.5 to 205.5 | 0.12 | 0.728 | 161.1  | 30.1 to 292.1   | 130.1  | 14.8 to 245.4   |
|                         | Comorbidity index | 25.6  | -148.2 to 199.4 | 0.08 | 0.773 | 154.9  | 24.4 to 285.4   | 129.3  | 14.5 to 244.1   |
|                         | Remoteness        | 9.7   | -163.9 to 183.3 | 0.01 | 0.913 | 138.4  | 7.1 to 269.8    | 128.7  | 15.1 to 242.3   |
| Sedentary time          |                   |       |                 |      |       |        |                 |        |                 |
| (min/week)              | Sex               | -68.7 | -274 to 136.9   | 0.43 | 0.512 | -199.2 | -353.3 to -45.1 | -130.5 | -266.6 to 5.6   |
|                         | Cancer type       | -62.7 | -268.5 to 143.0 | 0.36 | 0.550 | -193.1 | -347.4 to -38.9 | -130.4 | -266.6 to 5.7   |
|                         | Wear-time (min)   | -71.6 | -246.9 to 103.8 | 0.64 | 0.424 | -210.7 | -342.5 to -78.9 | -139.1 | -254.9 to -23.3 |
|                         | Age               | -63.0 | -268.3 to 142.3 | 0.36 | 0.548 | -195.4 | -349.3 to -41.6 | -132.4 | -268.4 to 3.5   |
|                         | Comorbidity index | -56.0 | -260.9 to 148.8 | 0.29 | 0.591 | -187.3 | -340.8 to -33.7 | -131.2 | -266.7 to 4.3   |
|                         | Remoteness        | -28.0 | -227.6 to 171.5 | 0.08 | 0.783 | -158.0 | -308.8 to -7.3  | -130.0 | -260.8 to 0.7   |
| Sedentary ≥20-min bouts |                   |       |                 |      |       |        |                 |        |                 |
| (min/week)              | Sex               | -62.0 | -278.4 to 154.4 | 0.32 | 0.575 | -72.9  | -235.1 to 89.3  | -10.9  | -154.3 to 132.4 |
|                         | Cancer type       | -52.1 | -268.7 to 164.4 | 0.22 | 0.637 | -63.2  | -225.5 to 99.1  | -11.1  | -154.4 to 132.2 |
|                         | Wear-time (min)   | -58.7 | -266.9 to 149.5 | 0.31 | 0.581 | -72.3  | -228.7 to 84.2  | -13.6  | -151.2 to 124.1 |
|                         | Age               | -53.5 | -270.1 to 163.1 | 0.23 | 0.628 | -66.8  | -229.1 to 95.5  | -13.3  | -156.8 to 130.2 |
|                         | Comorbidity index | -44.5 | -259 to 170.9   | 0.16 | 0.685 | -56.3  | -217.7 to 105.2 | -11.7  | -154.2 to 130.8 |
|                         | Remoteness        | -25.2 | -238.8 to 188.3 | 0.05 | 0.817 | -35.7  | -197.0 to 125.6 | -10.5  | -150.4 to 129.4 |

Months since diagnosis was not included due to missing data for this variable. Mean differences are estimated from the mixed model.

<sup>1</sup> Wald  $\chi^2$  test for the Arm x Time interaction.

Abbreviations: 95%CI = 95% confidence interval; MV10 = minutes of moderate-to-vigorous physical activity completed in bouts of at least 10 minutes MVPA = moderate-to-vigorous physical activity; PA = physical activity. T1= Baseline ; T2 = 12-weeks following baseline .
